# Supplementary material for: The DNA damage-dependent intra–S phase checkpoint is regulated by parallel pathways
Source: Springer Nature journal article supplement (doi:10.1038/ng845), 2002-02-19
Supplement: 41588_2002_BFng845z_MOESM1_ESM.pdf [file 41588_2002_BFng845z_MOESM1_ESM.pdf]

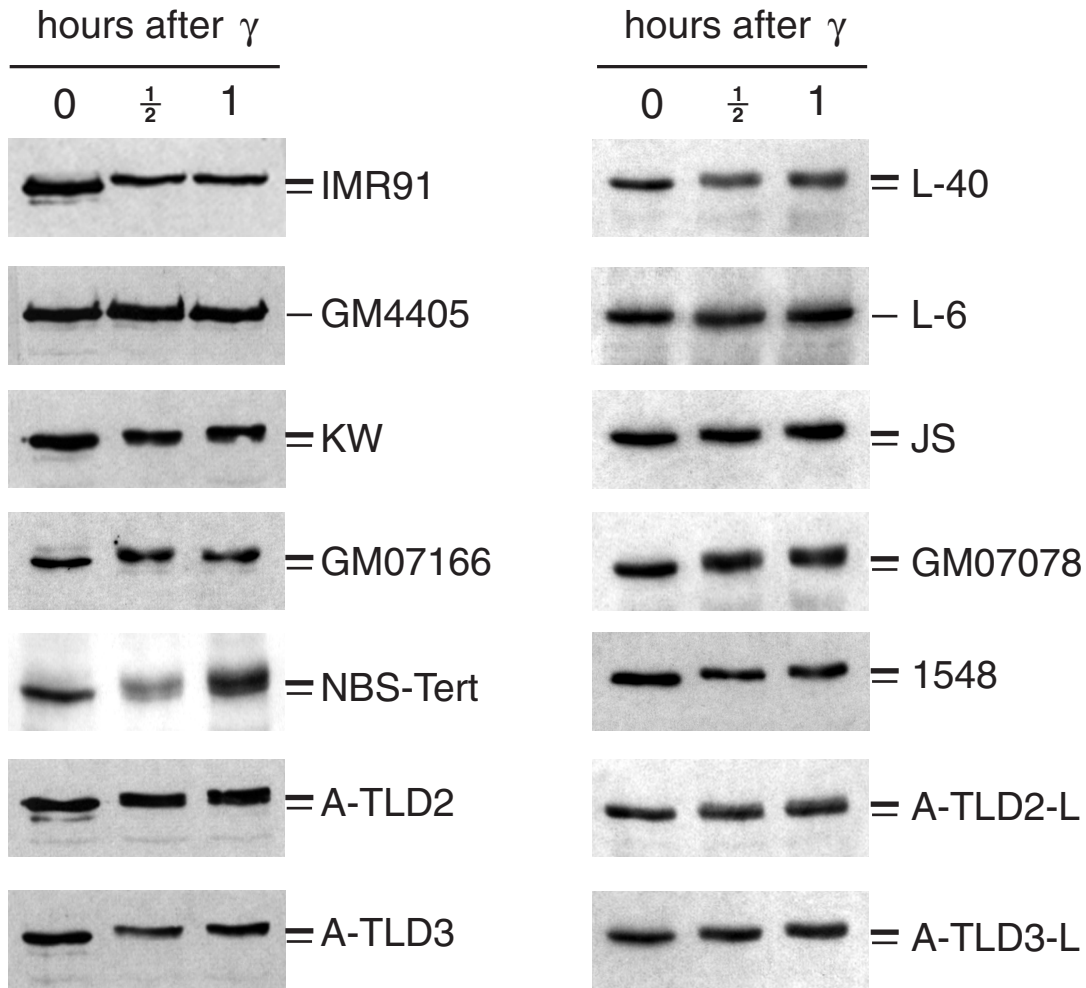

**Web Fig. A. IR-induced activation of Chk2 does not require Nbs1.**

Extracts from primary fibroblasts (**left panels**) from normal individuals (IMR91) and A-T (GM4405), A-TLD (A-TLD2 and A-TLD3), and NBS (KW, GM07166, and NBS-Tert), or lymphoblasts (**right panels**) derived from normal individuals (L-40) and A-T (L-6), A-TLD (A-TLD2-L and A-TLD3-L), and NBS (JS, GM07078, and 1548) patients were analysed by Western blotting for Chk2 protein modification (mobility shift) at the indicated time points following treatment with 5 Gy  $\gamma$ -irradiation (plain line, unmodified Chk2; bold line, shifted, phosphorylated Chk2).
